# Supplementary material for: Solvent-molecule-mediated manipulation of crystalline grains for efficient planar binary lead and tin triiodide perovskite solar cells
Source: Royal Society of Chemistry journal article supplement (doi:10.1039/c6nr00301j), 2016-01-01
Supplement: c6nr00301j1.pdf [file c6nr00301j1.pdf]

*Supporting Online Material for*

Solvent-molecule-mediated manipulation of  
crystalline grains for efficient planar binary lead  
and tin triiodide perovskite solar cells

Leize Zhu, Brian Yuh, Stefan Schoen, Xinpei Li, Mohammed Aldighaithir,  
Beau J. Richardson, Ahmed Alamer, and Prof. Qiuming Yu\*

Department of Chemical Engineering,

University of Washington, Seattle, WA 98195, USA

Corresponding author:

Qiuming Yu

Department of Chemical Engineering, University of Washington

Seattle, WA 98195, USA

Tel: 01-206-543-4807; Fax: 01-206-685-3451; Email: [qyu@uw.edu](mailto:qyu@uw.edu)

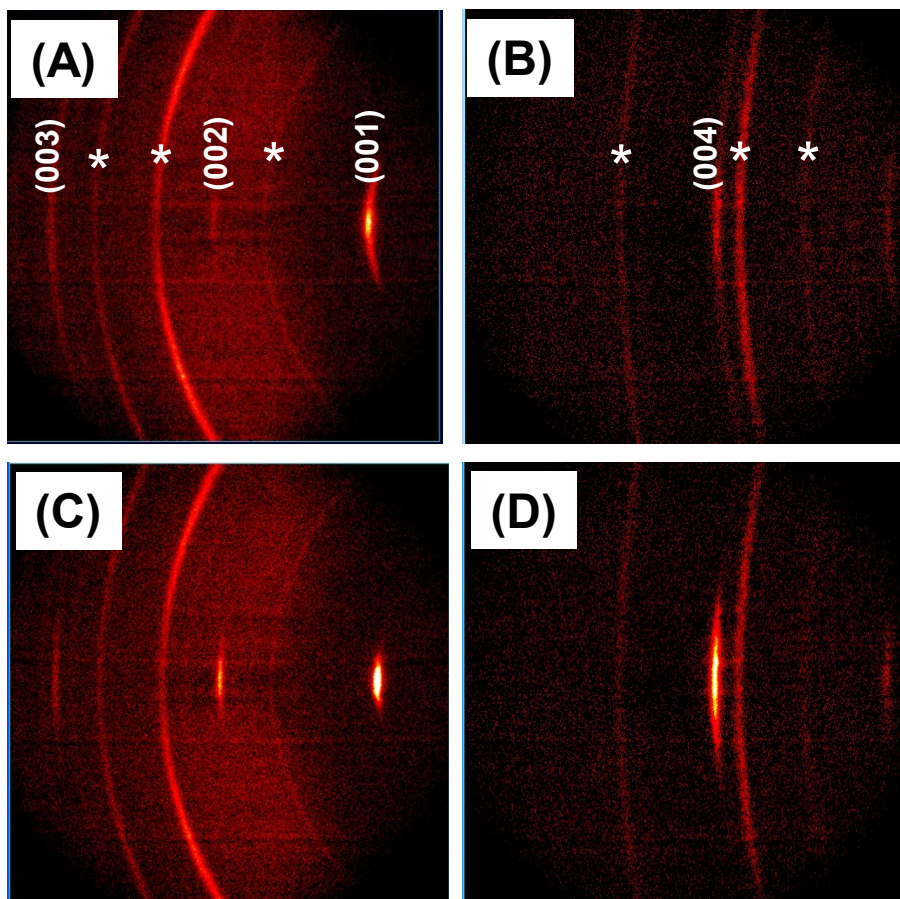

Fig. S1. The first frame ( $2\theta$  from  $10^\circ$  to  $40^\circ$ ) and the second frame ( $2\theta$  from  $40^\circ$  to  $70^\circ$ ) of 2D X-ray diffraction patterns of the  $\text{Sn}_{0.1}\text{Pb}_{0.9}\text{I}_2$  (A and B) and  $\text{Sn}_{0.25}\text{Pb}_{0.75}\text{I}_2$  (C and D) films. The scale of  $2\theta$  increases from right to left.

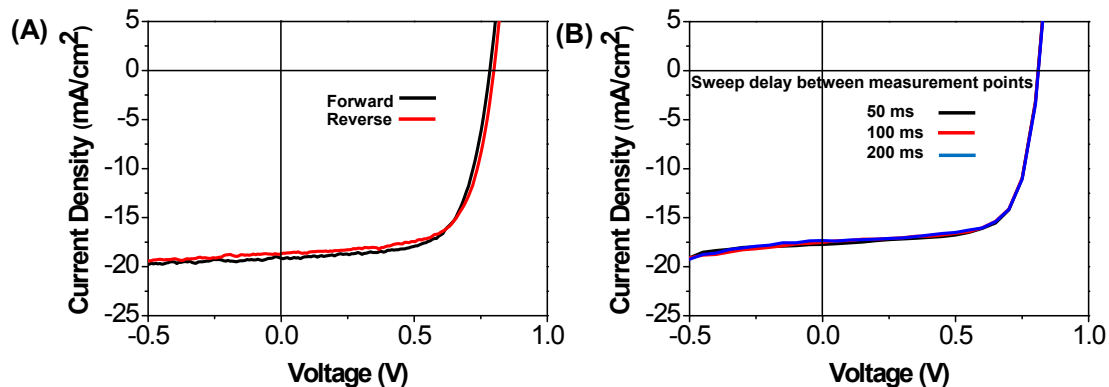

Fig. S2. Photocurrents of typical  $\text{CH}_3\text{NH}_3\text{Sn}_{0.25}\text{Pb}_{0.75}\text{I}_3$  perovskite solar cells measured (A) with the forward and reverse voltage scans and (B) with the sweep delays of 50, 100, and 200 ms between measurement points, corresponding to the scan rates of 0.14, 0.07 and 0.04 V/s, respectively. The perovskite layers prepared via thermal plus DMSO vapor-assisted annealing. The forward scan is defined as the scan direction from small to large voltage.

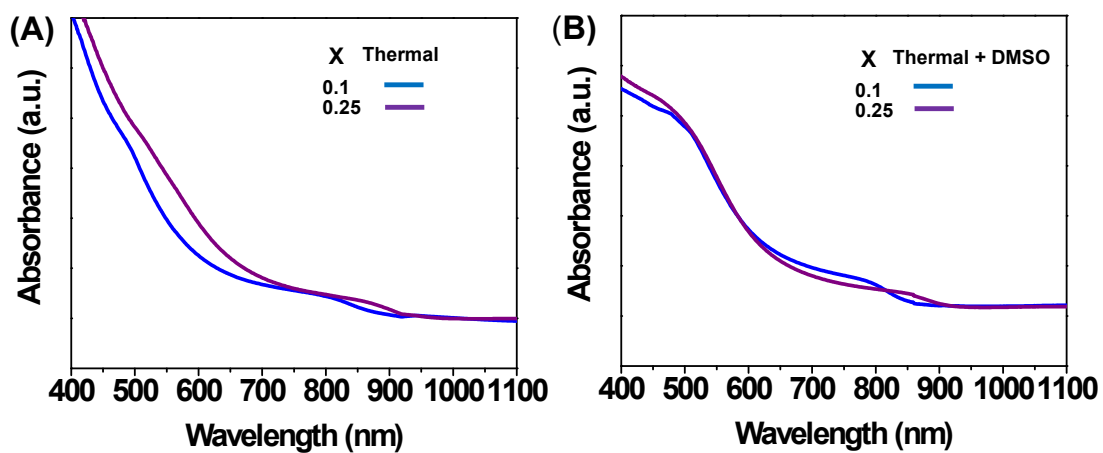

Fig. S3. The UV-Vis spectra of  $\text{CH}_3\text{NH}_3\text{Sn}_{0.1}\text{Pb}_{0.9}\text{I}_3$  and  $\text{CH}_3\text{NH}_3\text{Sn}_{0.25}\text{Pb}_{0.75}\text{I}_3$  films prepared via (A) only-thermal and (B) thermal plus DMSO vapor-assisted thermal annealing.
